# Supplementary material for: Transient, flexible gene editing in zebrafish neutrophils and macrophages for determination of cell-autonomous functions
Source: Oxford University Press journal article supplement (doi:10.1242/dmm.047431), 2021-07-01
Supplement: dmm047431supp.pdf [file dmm047431supp.pdf]

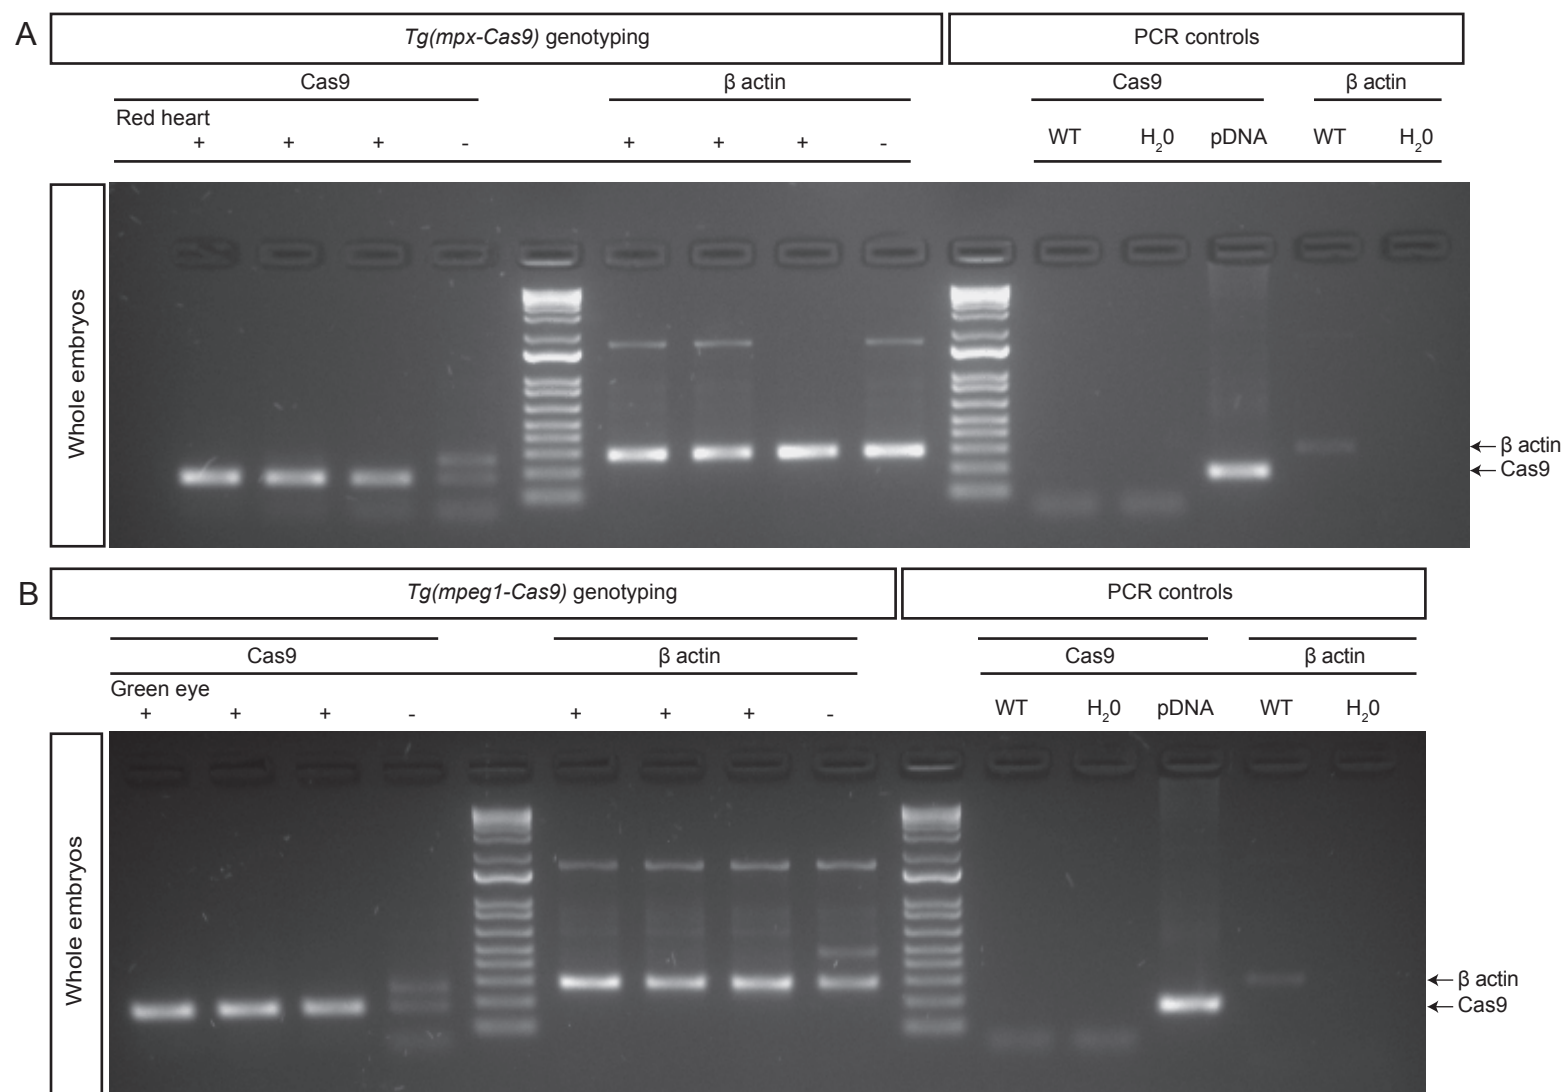

**Figure S1. Correlation of Cas9 genotyping with presence of tracer transgene in *Tg(mpx-Cas9)* and *Tg(mpeg1-Cas9)* zebrafish lines**

(A,B) Genotype confirmation of Cas9 cDNA segregation with Cas9 transgene plasmid backbone marker. Cas9-PCR genotyping of individual F1 *Tg(mpx-Cas9)* and F2 *Tg(mpeg1-Cas9)* zebrafish embryos selected for mCherry expression in phagocytes, and also presence/absence of the Cas9 transgene plasmid backbone marker (either red heart *Tg(mpx-Cas9)*, or green eye *Tg(mpeg1-Cas9)*).

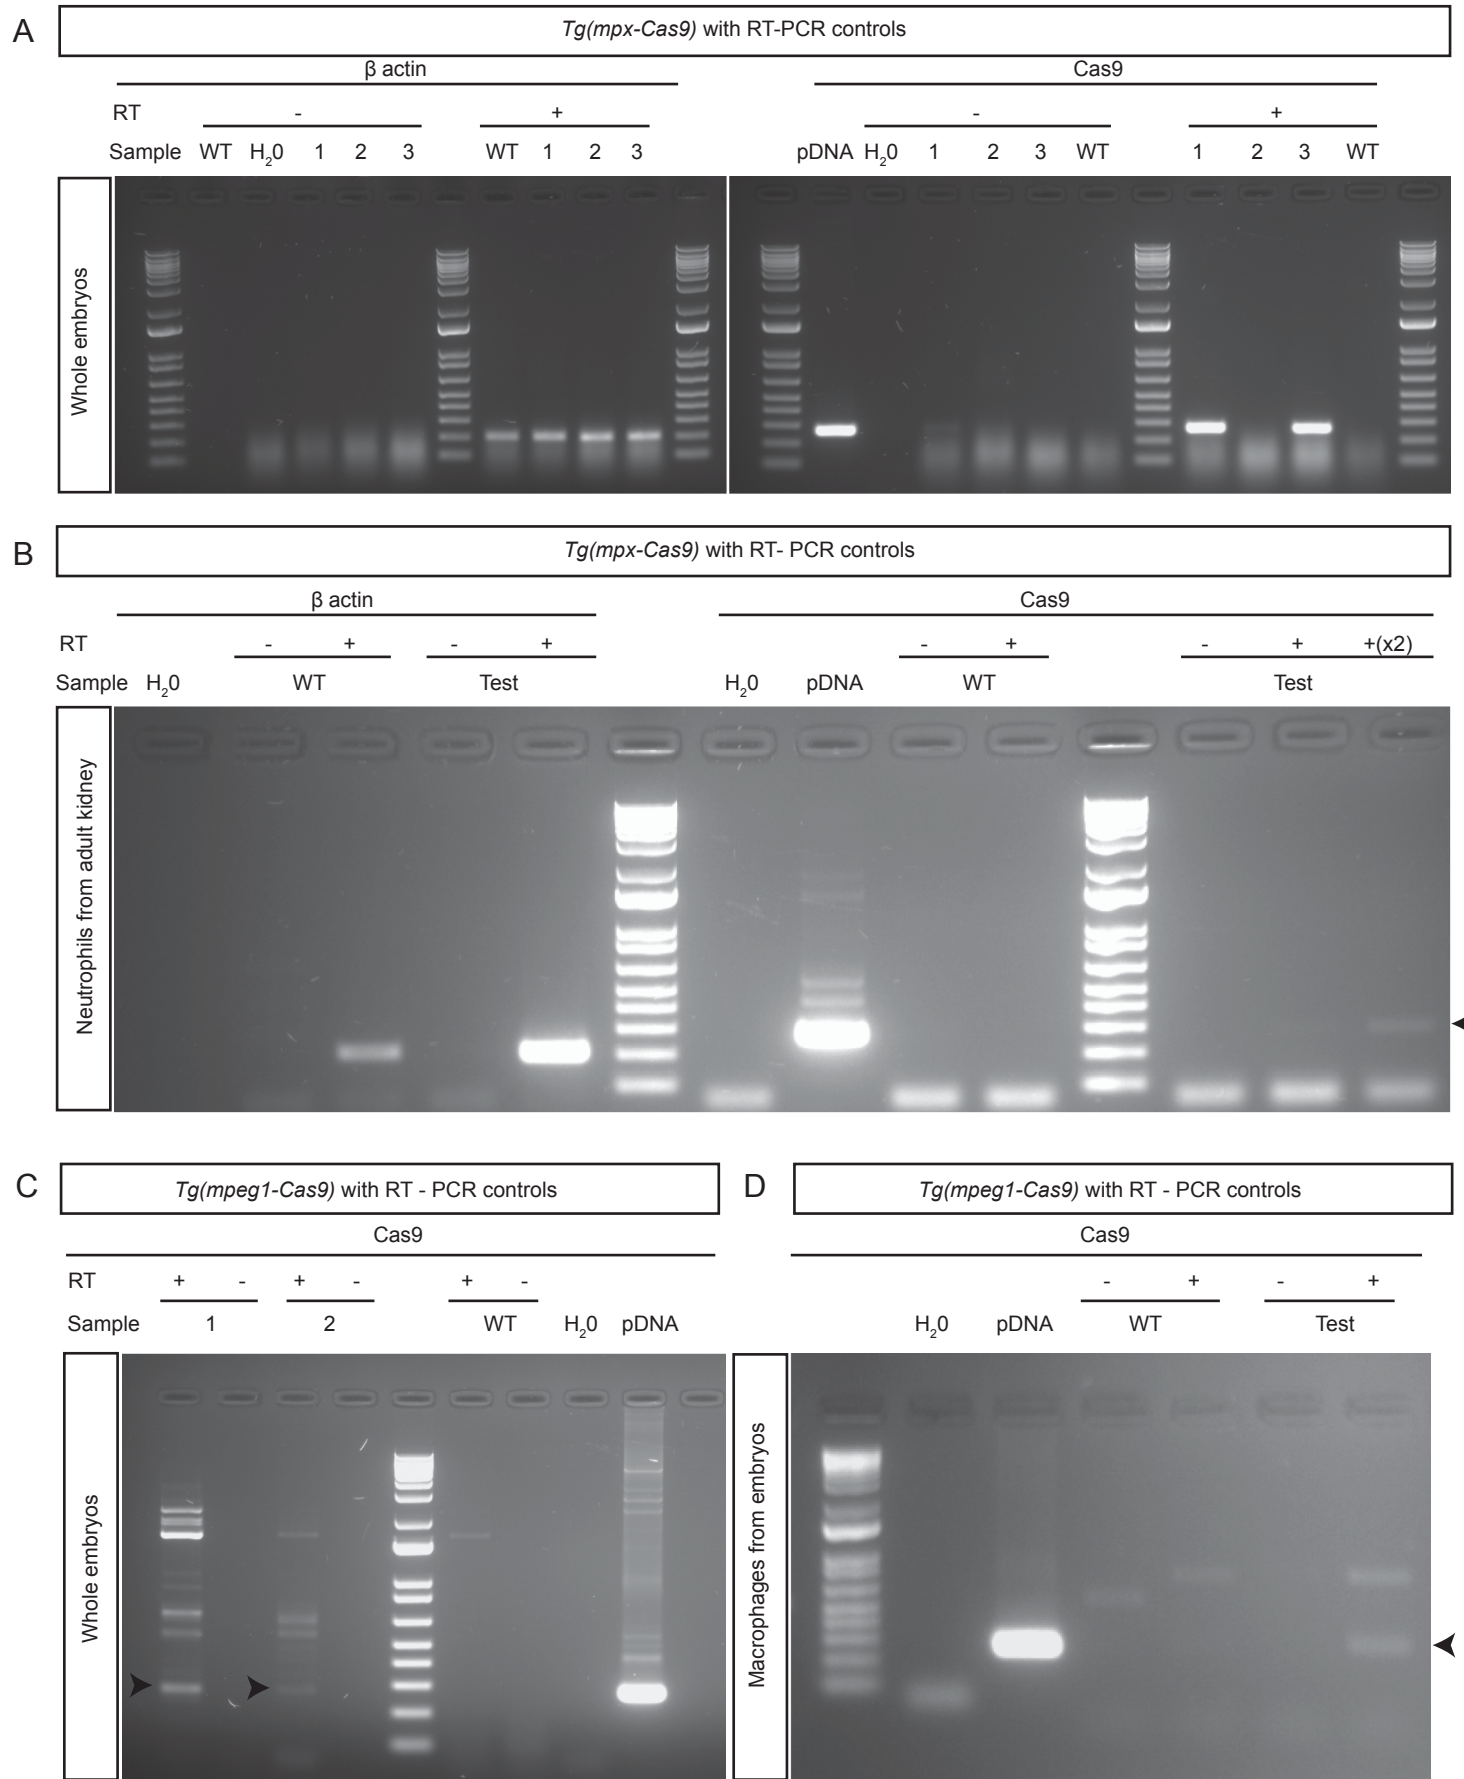

**Figure S2. Molecular confirmation of Cas9 mRNA expression in *Tg(mpx-Cas9)* and *Tg(mpeg1-Cas9)* zebrafish lines.**

(A) Cas9-RT-PCR of F2 *Tg(mpx-Cas9)* whole embryos, confirming Cas9 expression in 2/3 test embryos. The negative result in sample #2 is interpreted contextually as either an embryo sorting or PCR failure rather than a true negative result.

(B) Cas9-RT-PCR of neutrophils FACS-purified from F1 *Tg(mpx-Cas9)* adult whole kidney marrow, showing detection of Cas9-cDNA in the sample with double-dose template (x2).

(C,D) Cas9-RT-PCR of *Tg(mpeg1-Cas9)* whole F2 embryos (C) and macrophages FACS-purified from F4 pools (D), showing detection of Cas9-cDNA in the samples. In this analysis, the housekeeping gene sample-quality control PCR failed and the samples were exhausted precluding further analysis, but the absence of this sample integrity control does not undermine the observation of specific Cas9 positivity in the test samples. Arrowheads in B,C,D indicate faint Cas9 PCR products. Throughout these analyses PCR controls included are: wild type template (WT); water template (H<sub>2</sub>O); template-containing plasmid DNA positive control (pDNA);  $\otimes$  actin PCR for sample integrity ( $\otimes$  actin); for RT-PCRs, samples processed without and with reverse transcriptase (RT+ and RT-).

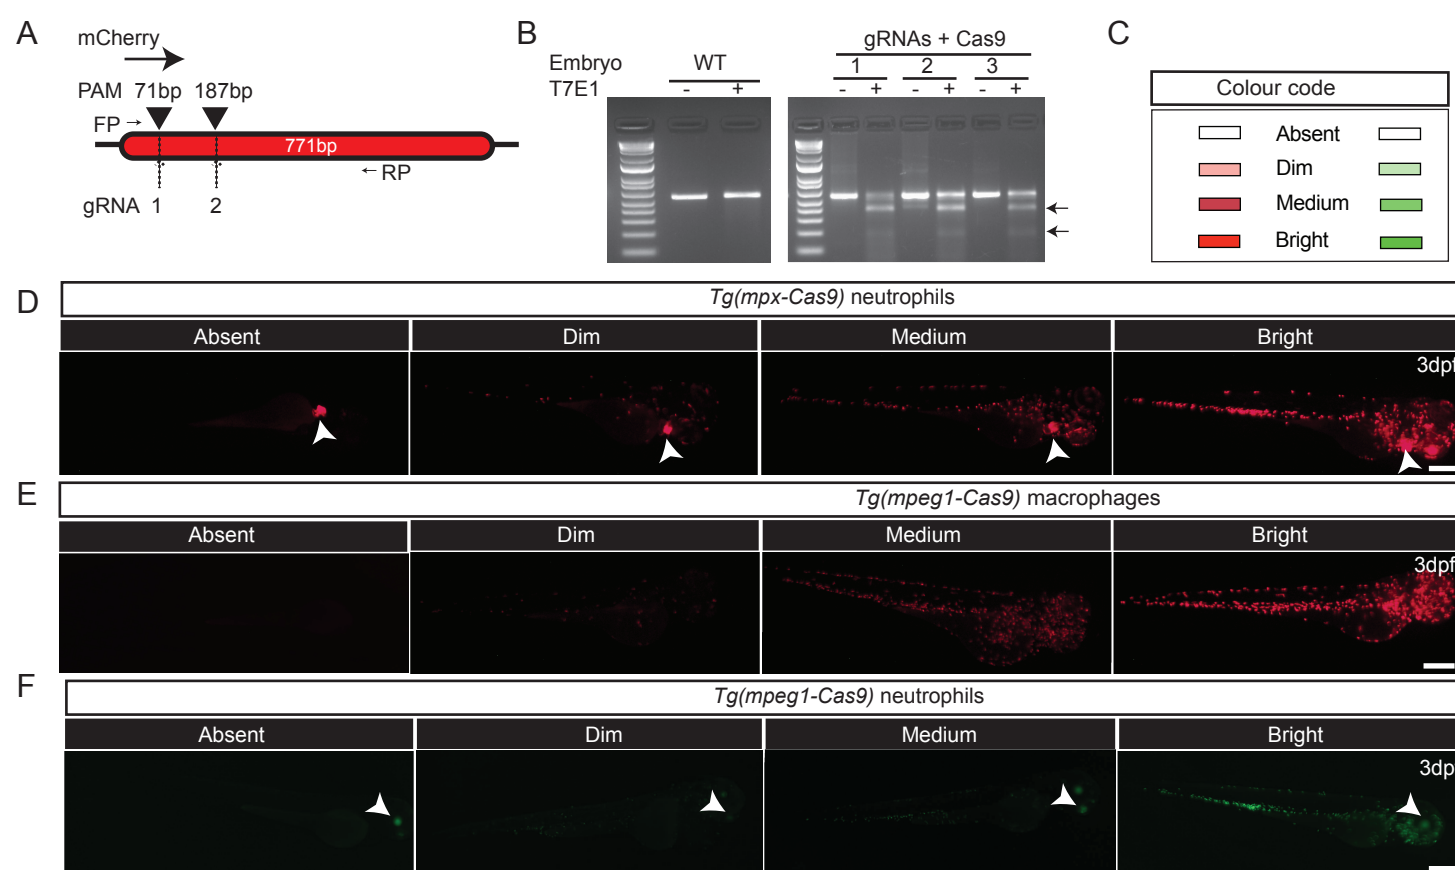

**Figure S3. mCherry reporter gene knockdown in leukocyte lineage-specific Cas9-expressing zebrafish embryos.**

(A) mCherry cDNA annotated to show the two targeted protospacer adjacent motif (PAM) gRNA sites.

(B) Confirmation of on-target activity of multiplexed mCherry-gRNA pairs demonstrated by T7 endonuclease digestion of heteroduplexes in mCherry PCR product (arrowed).

(C) Categorical scoring scale for mCherry and EGFP fluorescent leukocytes, as exemplified in (D-F), pertaining to Fig 1H-J.

(D-F) representative images of absent, dim, medium and bright leukocyte fluorescence categories for the reporter lines shown. White arrows indicate red heart (D) and green eye (F). For details of full genotypes, see Table 1.

Scale bar: 300  $\mu$ m.

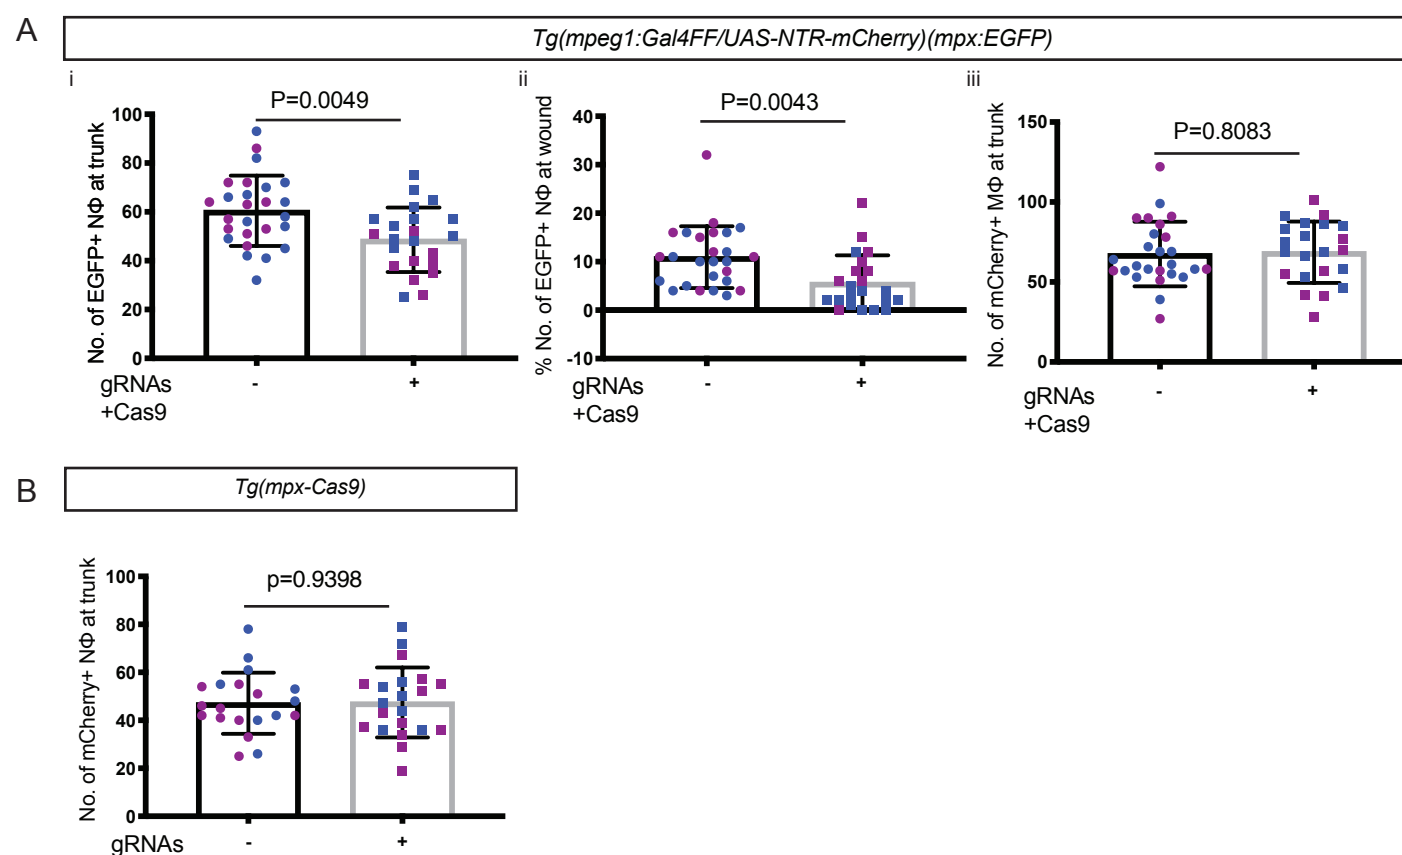

**Figure S4. Basal number of leukocytes in trim33 crispant zebrafish embryos.**

(A) Quantification of neutrophils (i, ii) and macrophages (iii) in the trunk of trim33 gRNA+Cas9 microinjected zebrafish embryos, compared to wild type, WT.

(B) Quantification of neutrophil number in the trunk of trim33 gRNA microinjected *Tg(mpx-Cas9)* zebrafish embryos, compared to WT.

Unpaired two-tailed Student T-test of pooled data from two independent experiments indicated by different colours.

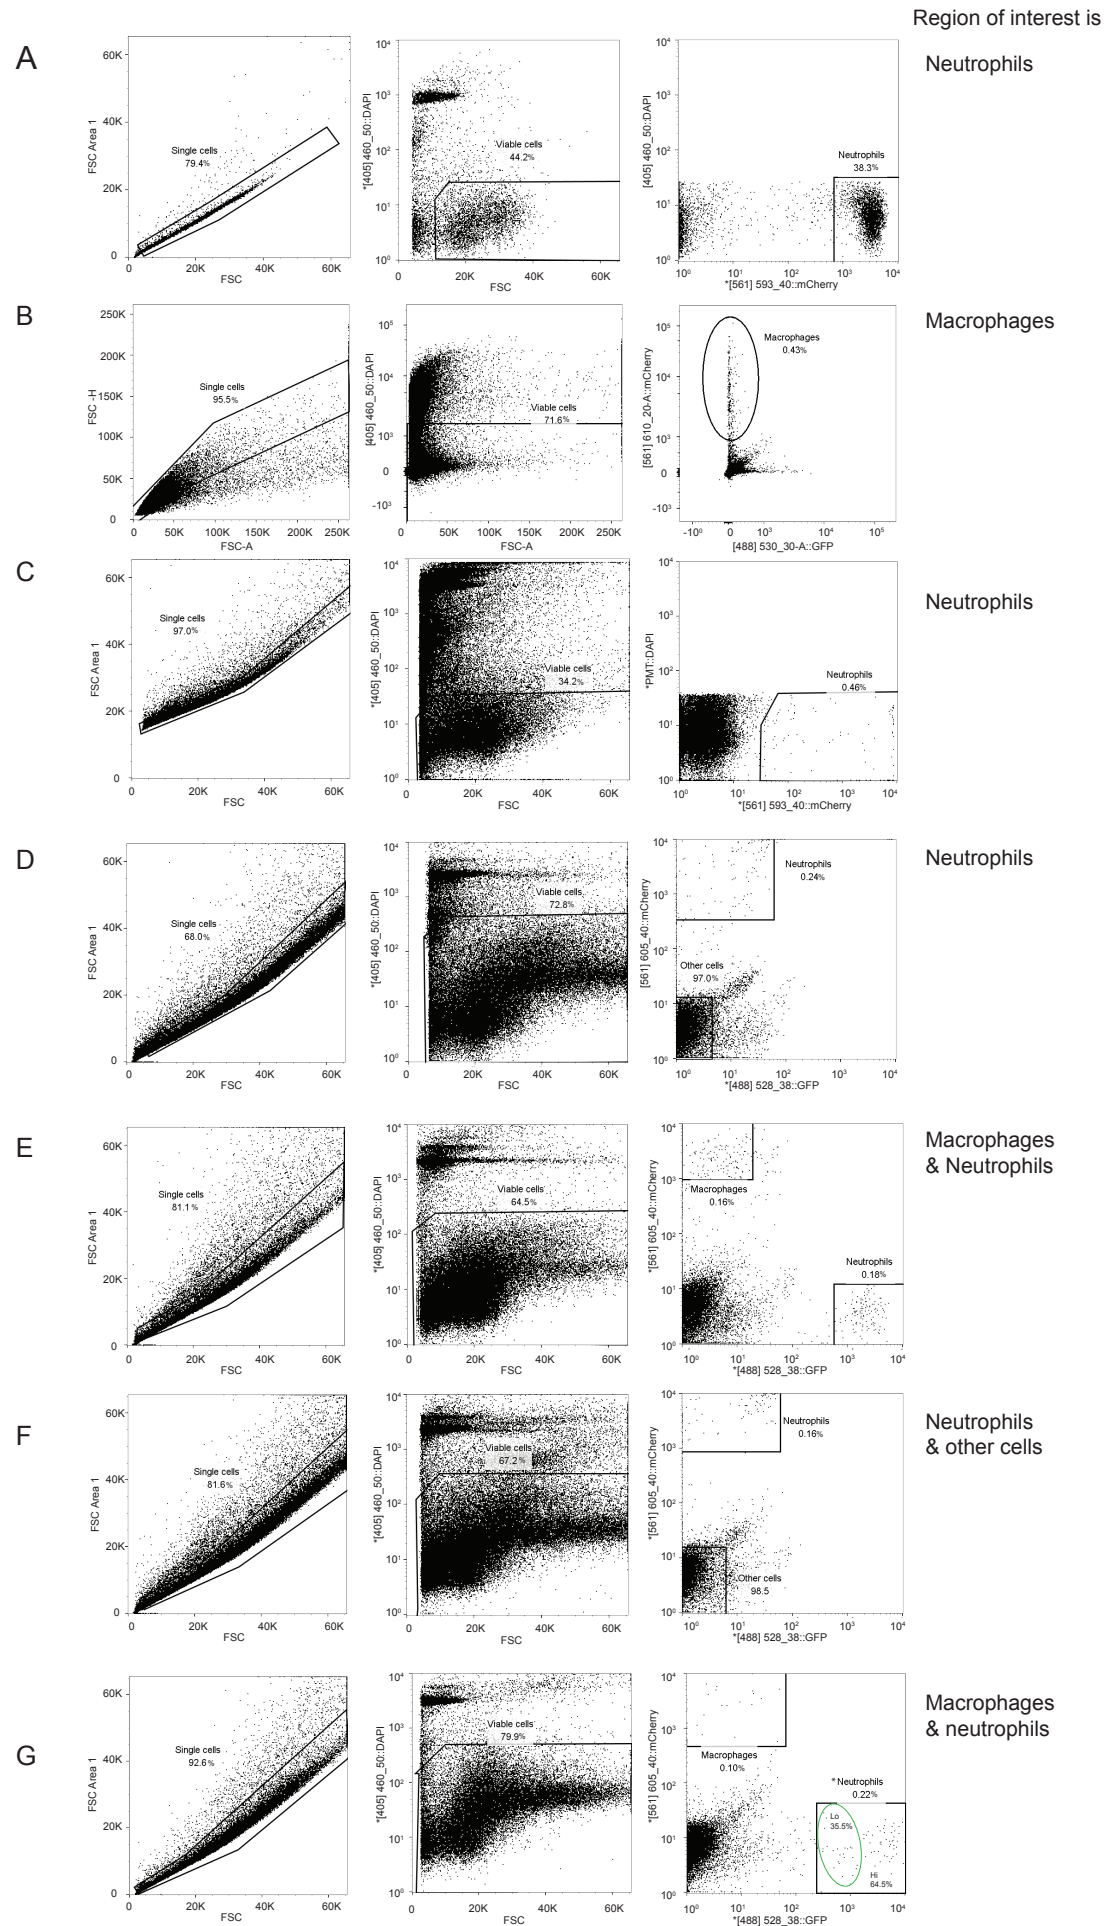

**Figure S5. FACS gating strategies for purification of neutrophils, macrophages and control cell populations.**

Gating strategy showing single, viable, mCherry (neutrophils or macrophages) and GFP (neutrophils) positive cells from single cell suspension

(A) 373,000 neutrophils purified from 3 pooled adult WKM, and

(B) 5, 000 macrophages purified from embryos (n= ~100) for RT-PCR and

(C-G) 743 neutrophils, 128 neutrophils, 1,170/1,231 macrophages/neutrophils, 101/52,177 neutrophils/other cells and 31/72 macrophages/neutrophils purified from embryos (n= ~5-15) for sequencing.

A and B contribute to data generated in Fig S2B and S2D respectively; C, D, E, F, G contribute to data generated in Fig 2iii, 2iv, 4, 5 & 6 respectively. \*This region contains both neutrophils and macrophages (Mathias et al., 2009): Lo indicates low GFP reporter transgene expressing cells (which have been demonstrated to be macrophages) and Hi indicates high GFP expressing cells (which are neutrophils).

A

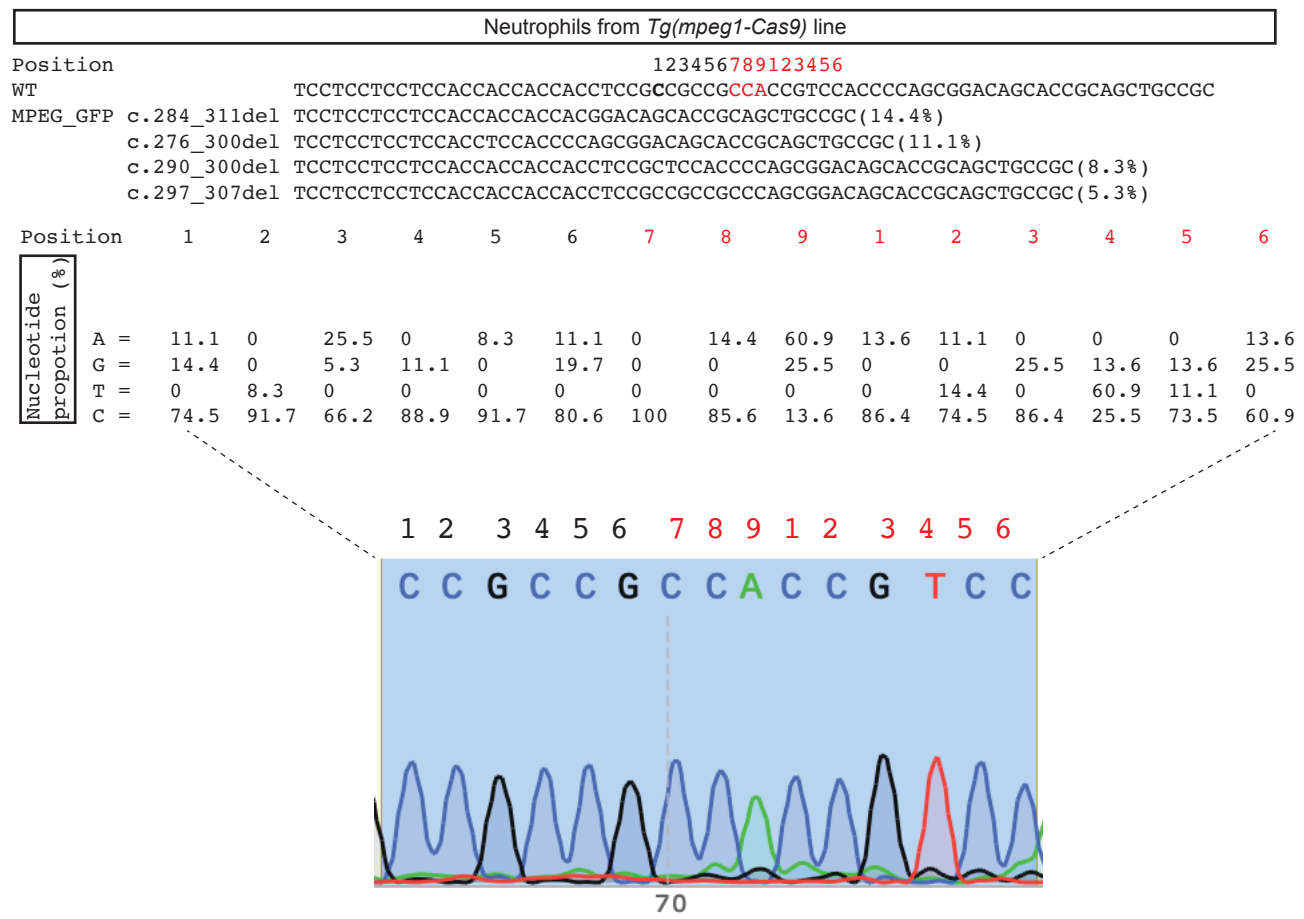

B

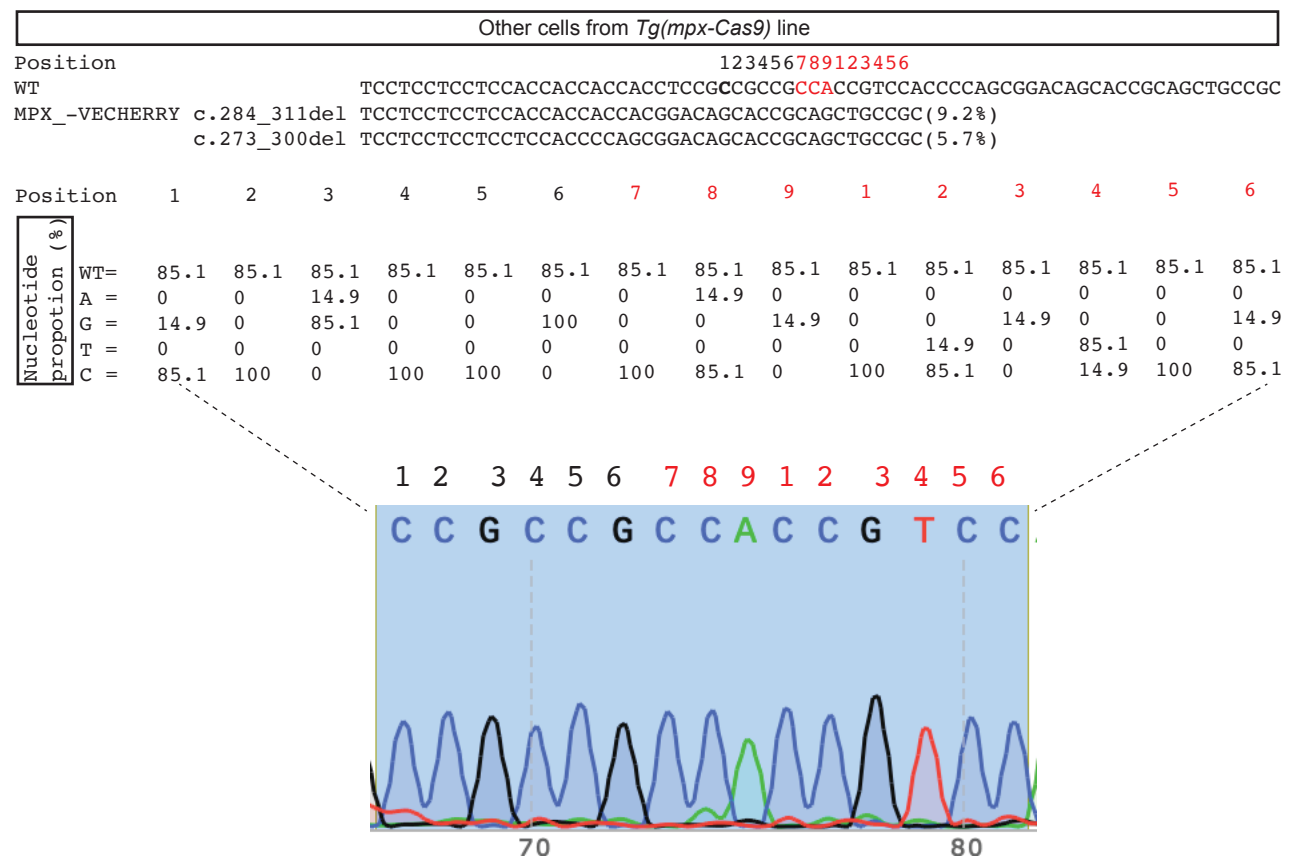



**Figure S6. Two examples of predicted proportional representations of nucleotides in Sanger sequencing chromatograms, given variant incidences in next generation sequencing analyses.**

(A) Analysis for mp<sub>x</sub>:EGFP-positive neutrophils in *Tg(mpeg1:Cas9)* line, injected with *trim33*-gRNA. The variants seen in NGS at the incidences shown (aligned upper sequences) are below the limit of detection of Sanger sequencing. Middle table is the computed summed proportions of AGCT corresponding with the Sanger chromatogram (below). Corresponds with Figure 6C.

(B) Analysis for non-mCherry positive other cells in *Tg(mp<sub>x</sub>:Cas9)* line, injected with *trim33*-gRNA. The variants seen in NGS at the incidences shown (aligned upper sequences) are below the limit of detection of Sanger sequencing. Middle table is the computed summed proportions of AGCT corresponding with the Sanger chromatogram (below). Corresponds with Figure 5C.

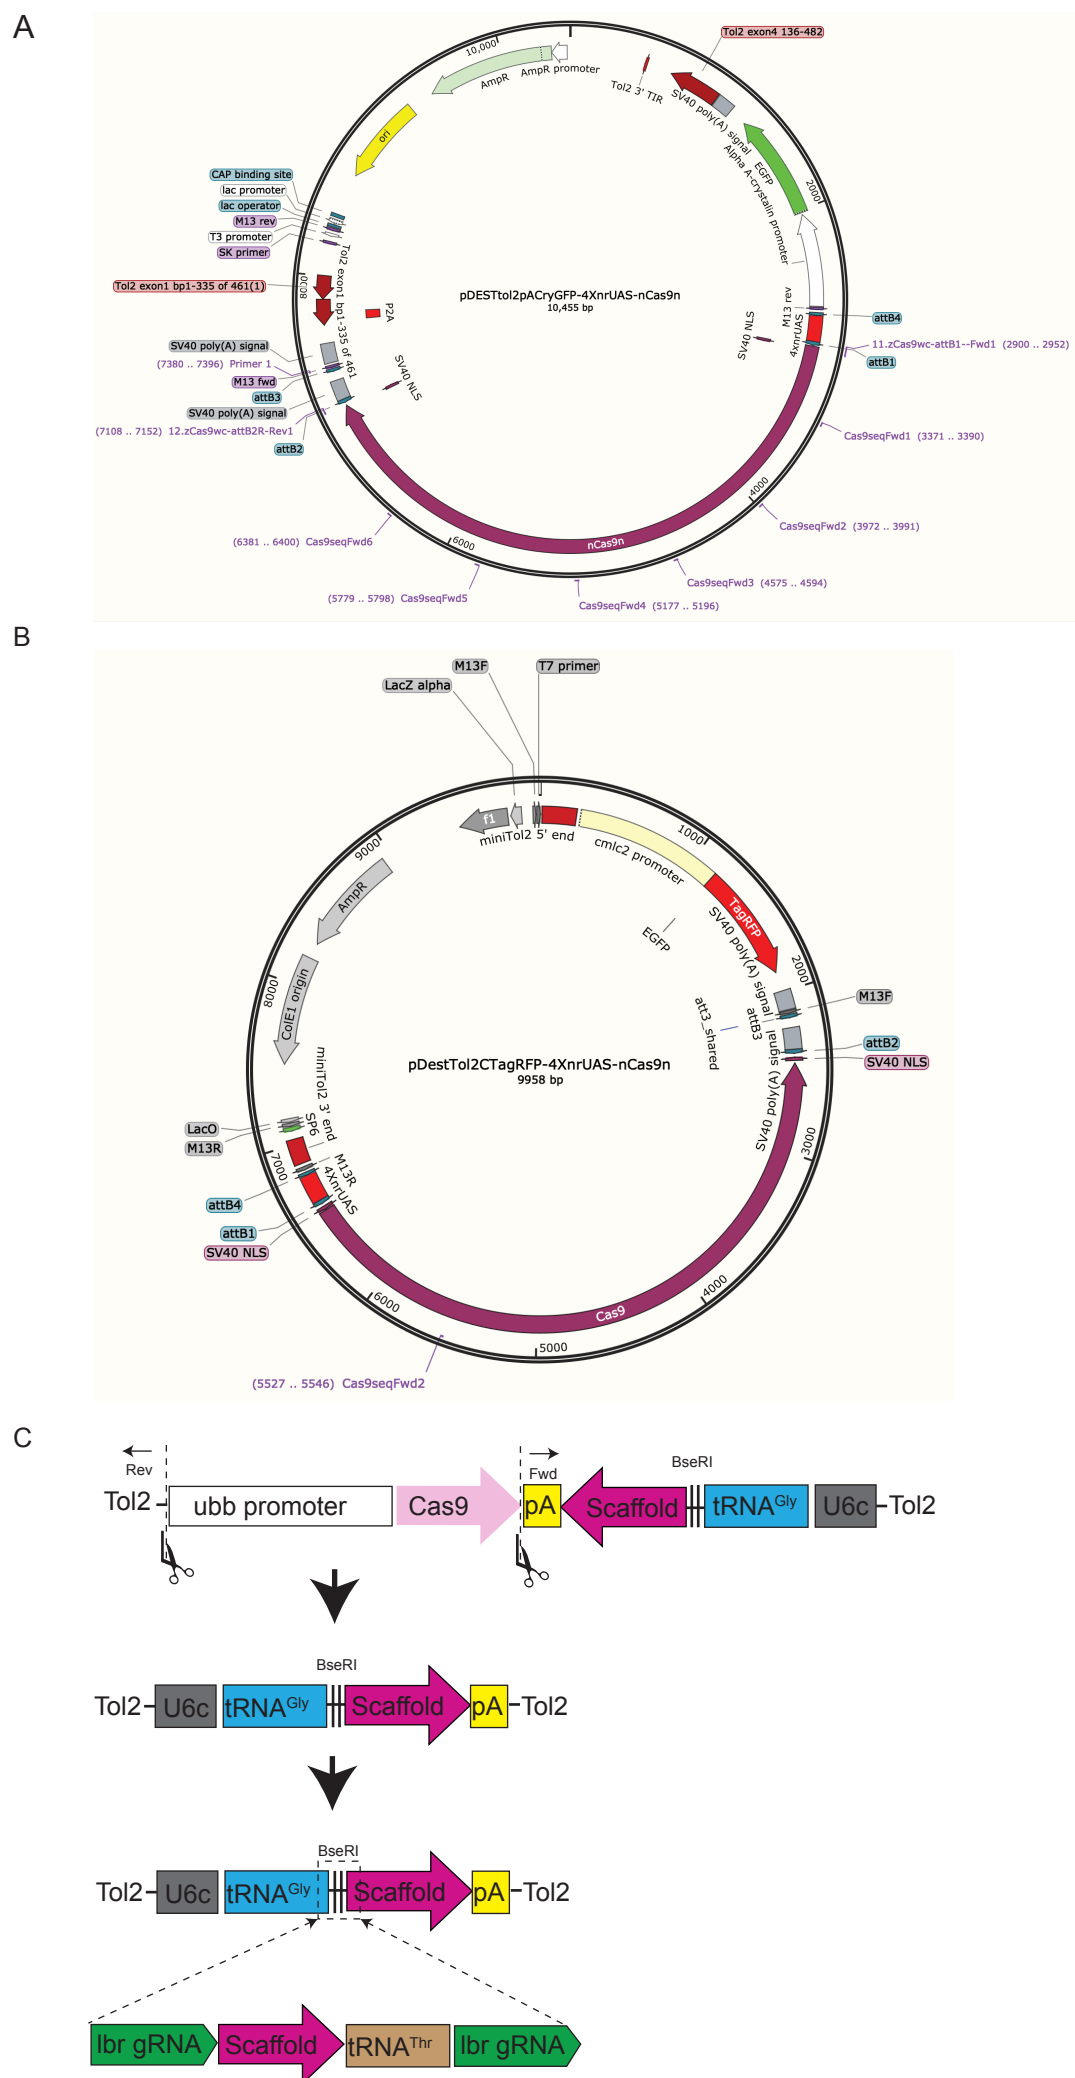

**Figure S7. Plasmid maps of Cas9 and *Ibr*-gRNA transgenes.**

(A) Shows circular annotation of *4xUAS:NLS-Cas9, cmic2:RFP* plasmid

(B) Shows circular annotation of *4xUAS:NLS-Cas9, cryaa:EGFP* plasmid

(C) Linear map annotation of steps for generating plasmid *Ibr-gRNA*

**Table S1. Primers**

| Name                                   | Sequence (5'-3')                                 | Purpose            |
|----------------------------------------|--------------------------------------------------|--------------------|
| Cas9_F1<br>Cas9_R1                     | GATCAGTGTAGCGTCCAGCA<br>GTGGAGCAGCACAAAGCATT     | PCR                |
| Cas9_F2<br>Cas9_R2                     | TCTGGCTACCCAGCTCCTTA<br>GGCATTCTGCAGACAGTGAA     | RT-PCR,<br>RT-qPCR |
| Cas9_F3<br>Cas9_R3                     | CTGGTATAGCGCCTTCTTGC<br>CAGGCACAGCATCAAGAAAA     | RT-PCR             |
| lbrFwd<br>lbrRev                       | TTGCAGAGTGTGGTCATTTTTC<br>ACACCCACTGCAAGTAAAACCT | PCR, NGS*          |
| trim33gRNA1Fwd<br>trim33gRNA1Rev       | CGACGACATCCAGCGATAG<br>CGACATCTCGGTAACCACAG      | PCR, NGS*          |
| trim33gRNA2Fwd<br>trim33gRNA2Rev       | TGAGCAGTCCAGAAGGAAGTT<br>TGCAGGAGGAAAGGTTATCG    | PCR                |
| $\beta$ actin_Fwd<br>$\beta$ actin_Rev | GCTGACAGGATGCAGAAGGA<br>TAGAAGCATTTCGCGGTGGAC    | RT-PCR             |
| Ppial_Fwd<br>Ppial_Rev                 | ACACTGAAACACGGAGGCAAAG<br>CATCCACAACCTTCCCGAACAC | RT- qPCR           |

\*NGS CS tags, forward- acactgacgacatggttctaca, reverse- tacggtagcagagacttggct

**Table S2. gRNAs**

| Name         | Sequence (5'-3')     | Target gene |
|--------------|----------------------|-------------|
| lbrgRNA      | GAACGGGAGCGACTGCGACG | lbr         |
| mCherrygRNA1 | CGCTTCAAGGTGCACATGGA | mCherry     |
| mCherrygRNA2 | TGGCCCCCTGCCCTTCGCCT | mCherry     |
| trim33gRNA1  | CTGTCCGCTGGGGTGGACGG | trim33      |
| trim33gRNA2  | GCTCAGTCCAGGACATTTTA | trim33      |

**Dataset 1. NGS variant data from *lbr* gene editing**

[Click here to download Dataset 1](#)

**Dataset 2. NGS variant data from *trim33* gene editing**

[Click here to download Dataset 2](#)
